# Supplementary material for: Association of cerebral palsy with autism spectrum disorder and attention-deficit/hyperactivity disorder in children: a large-scale nationwide population-based study
Source: PubMed Central journal article supplement — BMJ Paediatr Open. 2024 Apr 9;8(1):e002343. doi: 10.1136/bmjpo-2023-002343 (PMC11015243; doi:10.1136/bmjpo-2023-002343), 2024-04-09
Supplement: bmjpo-2023-002343.draft_revisions.pdf [file bmjpo-2023-002343.draft_revisions.pdf]

# BMJ Paediatrics Open

BMJ Paediatrics Open is committed to open peer review. As part of this commitment we make the peer review history of every article we publish publicly available.

When an article is published we post the peer reviewers' comments and the authors' responses online. We also post the versions of the paper that were used during peer review. These are the versions that the peer review comments apply to.

The versions of the paper that follow are the versions that were submitted during the peer review process. They are not the versions of record or the final published versions. They should not be cited or distributed as the published version of this manuscript.

BMJ Paediatrics Open is an open access journal and the full, final, typeset and author-corrected version of record of the manuscript is available on our site with no access controls, subscription charges or pay-per-view fees (<http://bmjpaedsopen.bmj.com>).

If you have any questions on BMJ Paediatrics Open's open peer review process please email [info.bmjpo@bmj.com](mailto:info.bmjpo@bmj.com)

# BMJ Paediatrics Open

## Association of Cerebral Palsy with Autism and Attention Deficit Hyperactivity Disorder in Children: A Large-Scale Nationwide Population-Based Study

|                               |                                                                                                                                                                                                                                                                                                                                                                                                                                                                                                                                                                                                                                                                                                                                  |
|-------------------------------|----------------------------------------------------------------------------------------------------------------------------------------------------------------------------------------------------------------------------------------------------------------------------------------------------------------------------------------------------------------------------------------------------------------------------------------------------------------------------------------------------------------------------------------------------------------------------------------------------------------------------------------------------------------------------------------------------------------------------------|
| Journal:                      | <i>BMJ Paediatrics Open</i>                                                                                                                                                                                                                                                                                                                                                                                                                                                                                                                                                                                                                                                                                                      |
| Manuscript ID                 | bmjpo-2023-002343                                                                                                                                                                                                                                                                                                                                                                                                                                                                                                                                                                                                                                                                                                                |
| Article Type:                 | Original research                                                                                                                                                                                                                                                                                                                                                                                                                                                                                                                                                                                                                                                                                                                |
| Date Submitted by the Author: | 02-Nov-2023                                                                                                                                                                                                                                                                                                                                                                                                                                                                                                                                                                                                                                                                                                                      |
| Complete List of Authors:     | Chen, Qiang; Zhuhai Women and Children's Hospital<br>Chen, Mingwu; University of Science and Technology of China, Department of Pediatrics<br>Bao, Wei; University of Science and Technology of China<br>Strathearn, Lane; University of Iowa Stead Family Children's Hospital; University of Iowa Carver College of Medicine, Stead Family Department of Pediatrics<br>Zang, Xiaodong; University of Science and Technology of China, Department of Pediatrics<br>Lun, Meng; University of Science and Technology of China, Department of Pediatrics<br>Xu, Guifeng; University of Science and Technology of China, Department of Pediatrics; The University of Iowa Roy J and Lucille A Carver College of Medicine, Pediatrics |
| Keywords:                     | Epidemiology                                                                                                                                                                                                                                                                                                                                                                                                                                                                                                                                                                                                                                                                                                                     |
|                               |                                                                                                                                                                                                                                                                                                                                                                                                                                                                                                                                                                                                                                                                                                                                  |

SCHOLARONE™  
Manuscripts

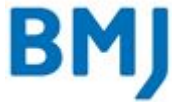

I, the Submitting Author has the right to grant and does grant on behalf of all authors of the Work (as defined in the below author licence), an exclusive licence and/or a non-exclusive licence for contributions from authors who are: i) UK Crown employees; ii) where BMJ has agreed a CC-BY licence shall apply, and/or iii) in accordance with the terms applicable for US Federal Government officers or employees acting as part of their official duties; on a worldwide, perpetual, irrevocable, royalty-free basis to BMJ Publishing Group Ltd ("BMJ") its licensees and where the relevant Journal is co-owned by BMJ to the co-owners of the Journal, to publish the Work in this journal and any other BMJ products and to exploit all rights, as set out in our [licence](#).

The Submitting Author accepts and understands that any supply made under these terms is made by BMJ to the Submitting Author unless you are acting as an employee on behalf of your employer or a postgraduate student of an affiliated institution which is paying any applicable article publishing charge ("APC") for Open Access articles. Where the Submitting Author wishes to make the Work available on an Open Access basis (and intends to pay the relevant APC), the terms of reuse of such Open Access shall be governed by a Creative Commons licence – details of these licences and which [Creative Commons](#) licence will apply to this Work are set out in our licence referred to above.

Other than as permitted in any relevant BMJ Author's Self Archiving Policies, I confirm this Work has not been accepted for publication elsewhere, is not being considered for publication elsewhere and does not duplicate material already published. I confirm all authors consent to publication of this Work and authorise the granting of this licence.

**Supplementary Table. Sensitivity analysis for the association of cerebral palsy with ASD and ADHD in US children, whose information was reported by their parents (n=152043).**

|                      | OR (95% CI)      |                     | P-value |
|----------------------|------------------|---------------------|---------|
|                      | Without cerebral | With cerebral palsy |         |
| <b>ASD</b>           |                  |                     |         |
| No. of cases/total   | 1797/151548      | 28/495              |         |
| Model 1 <sup>a</sup> | 1.00 (reference) | 5.02 (3.05-8.27)    | <0.001  |
| Model 2 <sup>b</sup> | 1.00 (reference) | 4.77 (2.89-7.86)    | <0.001  |
| <b>ADHD</b>          |                  |                     |         |
| No. of cases/total   | 11570/151548     | 87/495              |         |
| Model 1 <sup>a</sup> | 1.00 (reference) | 2.01 (1.43-2.81)    | <0.001  |
| Model 2 <sup>b</sup> | 1.00 (reference) | 1.84 (1.28-2.65)    | <0.001  |

<sup>a</sup> Model 1: adjusted for age and sex.

<sup>b</sup> Model 2: model 1 plus race/ethnicity, family highest education level, family income to poverty ratio, and geographic region.

1  
2  
3 **Association of Cerebral Palsy with Autism and Attention Deficit Hyperactivity Disorder**  
4  
5 **in Children: A Large-Scale Nationwide Population-Based Study**  
6  
7

8 Qiang Chen<sup>1</sup>, Mingwu Chen<sup>2</sup>, Wei Bao<sup>3</sup>, Lane Strathearn<sup>4,5</sup>, Xiaodong Zang<sup>2</sup>, Lun Meng<sup>2</sup>,  
9  
10 Guifeng Xu<sup>2\*</sup>  
11  
12  
13

14  
15 1 Zhuhai Center for Maternal and Child Health Care, Zhuhai Women and Children's  
16  
17 Hospital, Zhuhai, China  
18

19  
20 2 Department of Pediatrics, The First Affiliated Hospital of USTC, Division of Life Sciences  
21  
22 and Medicine, University of Science and Technology of China, Hefei, Anhui, China  
23

24  
25 3 Institute of Public Health, Division of Life Sciences and Medicine, University of Science  
26  
27 and Technology of China, Hefei, Anhui, China  
28

29  
30 4 Center for Disabilities and Development, University of Iowa Stead Family Children's  
31  
32 Hospital, Iowa City, IA, USA  
33

34  
35 4 Division of Developmental Behavioral Pediatrics, Stead Family Department of Pediatrics,  
36  
37 University of Iowa Carver College of Medicine, Iowa City, IA, USA  
38  
39

40 **\*Corresponding author:** Guifeng Xu, MD, PhD, Department of Pediatrics, The First  
41  
42 Affiliated Hospital, University of Science and Technology of China, Hefei 230031, China,  
43  
44 Email: xguifeng365@ustc.edu.cn  
45

46 **Keywords:** Cerebral Palsy, autism spectrum disorder, attention-deficit/hyperactivity disorder  
47

48 **Word count:** Abstract #205, Text #1957  
49  
50  
51  
52  
53  
54  
55

**ABSTRACT**

**Objective** To examine the association of cerebral palsy with ASD and ADHD, providing evidence for interdisciplinary medical service for children with cerebral palsy.

**Design** A large-scale nationwide population-based study.

**Setting** the National Health Interview Survey (NHIS).

**Patients** 177899 children aged 3-17 years old among NHIS participants from 1997 to 2003 and 2008 to 2018.

**Results** Among the 177899 children included in this analysis, 602 (0.33%) had cerebral palsy, 1997 (1.16%) had ASD, and 13697 (7.91%) had ADHD. Compared to children without cerebral palsy, children with cerebral palsy had a higher prevalence of ASD (6.09% versus 1.15%;  $P < 0.001$ ) and ADHD (15.91% versus 7.89%;  $P < 0.001$ ). After adjustment for age, sex, race/ethnicity, family highest education level, family income level, and geographical region, the OR among children with cerebral palsy, compared with children without cerebral palsy, was 5.07 (95% CI 3.25-7.91) for ASD ( $P < 0.001$ ) and 1.95 (95% CI 1.43-2.66) for ADHD ( $P < 0.001$ ). Furthermore, the association of cerebral palsy with ASD and ADHD remained significant in all subgroups stratified by age, sex and race.

**Conclusions** In a large, nationally representative sample of US children, this study shows that children with cerebral palsy are at an increased risk of ASD and ADHD.

**WHAT IS ALREADY KNOWN ON THIS TOPIC**

Children with cerebral palsy are more likely to have cognitive impairment. Besides, neurodevelopmental disorders, including intellectual disability and learning disability, are well documented comorbid conditions among children with cerebral palsy.

**WHAT THIS STUDY ADDS**

This study quantified the odds ratios of autism spectrum disorder (ASD) and attention deficit hyperactivity disorder (ADHD) among children with cerebral palsy, compared with children without cerebral palsy. Furthermore, the association of cerebral palsy with ASD and ADHD remained significant in all subgroups stratified by age, sex and race.

**HOW THIS STUDY MIGHT AFFECT RESEARCH, PRACTICE OR POLICY**

Cerebral Palsy, ASD and ADHD are usually diagnosed in different clinical specialties, with different intervention approaches. Therefore, This study provides evidence of their co-occurrence risk, and informs better interdisciplinary clinic care.

## INTRODUCTION

Cerebral palsy is a neurological disorder of motor impairment that results from non-progressive disturbances during brain development in fetuses or infants<sup>1,2</sup>. It is a major cause of childhood disability. Worldwide, prevalence estimates for cerebral palsy ranged from 1.5 to more than 4 per 1000 live births or children of a defined age range<sup>3</sup>. Cerebral palsy varies in the timing of the lesion, the clinical presentation, and the site and severity of the impairments<sup>1</sup>. The multifactorial etiology of cerebral palsy may involve any insults with a negative impact on the developing fetal or neonatal brain, such as preterm birth, fetal growth restriction, multiple gestation, intrauterine infection, birth asphyxia, untreated maternal hypothyroidism, congenital malformations, and perinatal stroke<sup>3,4</sup>. Most children with cerebral palsy have an abnormal brain magnetic resonance imaging (MRI) scan, including white matter damage, basal ganglia or deep grey matter damage, congenital malformation, and focal infarcts<sup>5</sup>. Motor disorders in cerebral palsy are often associated with disturbances of sensation, perception, cognition, communication, behavior, and epilepsy<sup>6</sup>. Individuals with cerebral palsy have increased risk for emotional lability, irritability, impulsiveness, and behavioral problems<sup>7</sup>. Neurodevelopmental disorders, including intellectual disability and learning disability, are well documented comorbid conditions among children with cerebral palsy.

Autism spectrum disorder (ASD) and attention deficit/hyperactivity disorder (ADHD) are childhood-onset neurodevelopmental disorders with a worldwide prevalence of 1% and 5%, respectively<sup>8</sup>. ASD is characterized by repetitive behaviors and restricted interests, social impairments, and communication difficulties<sup>9,10</sup>, and ADHD is characterized by persistent and impairing inattention, hyperactivity, and impulsivity.<sup>11</sup> Comorbidity and



1  
2  
3 overlapping traits between ASD and ADHD are common <sup>8, 12, 13</sup>. Moreover, previous clinical  
4  
5 and epidemiological studies reported that the prevalence of ASD and ADHD was higher in  
6  
7 children with cerebral palsy, compared to children without cerebral palsy <sup>6</sup>. Recently, the UK  
8  
9 National Institute for Health and Care Excellence Clinical Guideline on cerebral palsy  
10  
11 underlined the importance of investigating the prevalence of ASD and ADHD in children and  
12  
13 young people with cerebral palsy.<sup>5</sup> ASD and ADHD are interrelated neurodevelopmental  
14  
15 disorders and they may share pathological mechanisms and clinical features with cerebral  
16  
17 palsy <sup>14</sup>. However, there has been no quantitative assessment about the association (i.e., odds  
18  
19 ratio or risk ratio) of cerebral palsy with ASD and ADHD. This may be due to the limited  
20  
21 sample size (up to 2000) in previous studies <sup>6</sup>, which precludes a robust estimation of the  
22  
23 association between relatively rare conditions such as cerebral palsy and most  
24  
25 neurodevelopmental disorders.  
26  
27  
28  
29

30  
31 In this study, we analyzed large population-based data to quantify the association of  
32  
33 cerebral palsy with ASD and ADHD, in a nationally representative sample of US children.  
34  
35  
36  
37

## 38 **METHODS**

### 39 **Research Ethics Approval Statement**

40  
41  
42 The NHIS was approved by the Research Ethics Review Board of the NCHS and the  
43  
44 U.S. Office of Management and Budget. All respondents provided oral consent prior to  
45  
46 participation. The University of Science and Technology of China Institutional Review  
47  
48 Board determined that the present study was exempt based on the use of deidentified data  
49  
50 and approved the manuscript submission (ID: 202112241025000533025).  
51  
52  
53  
54  
55

## Study Population

The National Health Interview Survey (NHIS), conducted annually by the Centers for Disease Control and Prevention, is a leading health survey in the United States<sup>15</sup>. It has become the principal source of information on health of the civilian noninstitutionalized population of the United States. Annual sample size of the NHIS is about 35,000 households containing about 87,500 persons. The NHIS collects data on a broad range of health topics for all household members, including children, through in-person household interviews. The NHIS has a large sample size and a relatively high response rate.

In the current analysis, we included 177899 children aged 3-17 years old among participants in the NHIS from 1997 to 2003 and 2008 to 2018. A previous study indicated that there was high likelihood of interviewer error for cerebral palsy in 2004-2007 arising from a questionnaire change during those years<sup>16</sup>, therefore, we excluded survey years from 2004 to 2007 in the current analysis.

## Ascertainment of Cerebral Palsy and Neurodevelopmental Outcomes

For each interviewed family in the household, one sample child (if any children aged  $\leq 17$  years are present) is randomly selected through the field representative's computer program, and no differential sampling probabilities are applied to the children<sup>17</sup>. Detailed health-related information, including information on physical and mental health, is collected for the sample child. This information is provided by an adult (usually a parent) who is knowledgeable about the child's health.

Cerebral palsy was defined based on an affirmative response (i.e., yes) to the question<sup>18</sup>: "Has a doctor or health professional ever told you that [the sample child] had cerebral palsy?" ASD was defined based on an affirmative response to a question asking whether the

1  
2  
3 sample child received a diagnosis of ASD from a physician or other health professional.<sup>19</sup>  
4  
5 From 1997 to 2013, this question was asked as part of a 10-condition checklist. In 2014  
6  
7 onward, the question became a stand-alone item and the wording was revised to name  
8  
9 specific conditions, including autism, Asperger disorder, pervasive developmental disorder,  
10  
11 and ASD. ADHD was defined based on an affirmative response (i.e., yes) to the question:<sup>20</sup>  
12  
13 “Has a doctor or health professional ever told you that [the sample child] had attention-  
14  
15 deficit/hyperactivity disorder (ADHD) or attention-deficit disorder (ADD)?”  
16  
17  
18

### 19 **Covariates Assessment**

20  
21 Information on age, sex, race/ethnicity, family highest education level, family income,  
22  
23 and geographic region was collected using standardized questionnaire during the interview.  
24  
25 Race and Hispanic ethnicity were self-reported and classified based on the 1997 Office of  
26  
27 Management and Budget Standards. Family highest education level was classified into less  
28  
29 than high school, high school, and college or higher. Family income levels were classified  
30  
31 according to the ratio of family income to federal poverty level (<1.0, 1.0-1.9, 2.0-3.9, and ≥  
32  
33 4.0).  
34  
35  
36  
37

### 38 **Statistical Analysis**

39  
40 We included survey sampling weights, strata, and primary sampling units in all the  
41  
42 analyses to account for the unequal probabilities of selection, oversampling, and nonresponse  
43  
44 in the complex survey design. Therefore, the results in this study are nationally representative  
45  
46 of the US children. Comparisons of baseline characteristics among children with and without  
47  
48 cerebral palsy were performed using linear regression for continuous variables and the chi-  
49  
50 square test for categorical variables. We estimated the odds ratio (OR) and 95% confidence  
51  
52 interval (CI) of ASD, ADHD, and other neurodevelopmental disabilities according to history  
53  
54  
55  
56  
57  
58  
59  
60

---

**Running Title: Association of Cerebral Palsy with ASD and ADHD**

---

of cerebral palsy diagnosis using multivariable logistic regression, adjusting for age, sex, race/ethnicity, family highest education level, family income to poverty ratio, and geographic region. All data analyses were conducted using survey procedures of SAS 9.4 (SAS Institute Inc., Cary, NC). Two-sided  $P < 0.05$  was considered statistically significant.

## RESULTS

Among the 177899 children of 3-17 years included in this analysis, 602 (0.33%) had cerebral palsy, 1997 (1.16%) had ASD, and 13697 (7.91%) had ADHD. Children with cerebral palsy were more likely to be male and more likely to have lower family income than those without cerebral palsy (**Table 1**).

Compared with children without cerebral palsy, children with cerebral palsy had a higher prevalence of ASD (6.09% [95% CI 3.56-8.62] versus 1.15% [95% CI 1.07-1.22];  $P < 0.001$ ) and ADHD (15.91% [95% CI 12.07-19.75] versus 7.89% [95% CI 7.72-8.06];  $P < 0.001$ ). After adjustment for age, sex, race/ethnicity, family highest education level, family income level, and geographical region, compared with children without cerebral palsy, the OR among children with cerebral palsy was 5.07 (95% CI 3.25-7.91) for ASD ( $P < 0.001$ ) and 1.95 (95% CI 1.43-2.66) for ADHD ( $P < 0.001$ ) (**Table 2**). These associations remained significant in stratified analyses by age, sex, and race/ethnicity. The association between cerebral palsy and ADHD appeared to be stronger among non-whites (2.92 [1.85-4.59]) than whites (1.51 [1.00-2.26]) ( $P$  for interaction = 0.03) (**Table 3**). There was suggesting evidence that the association between cerebral palsy and ASD may differ according to age and sex, which warrants further investigation in future studies with even larger number of participants.

1  
2  
3 In a sensitivity analysis among children (n=152043) whose information was reported  
4 by their parents rather than other members in the household, the results were similar to our  
5  
6 main results (**Supplementary Table**).  
7  
8  
9

## 10 11 12 **DISCUSSION**

13  
14 Using data from a large nationwide population-based study, we found a significant  
15 and positive association of cerebral palsy with ASD and ADHD. Compared with children  
16 without cerebral palsy, children with cerebral palsy were at five-fold and doubled risk for  
17 ASD and ADHD, respectively. The associations persisted after adjustment for age, sex,  
18 race/ethnicity, family highest education level, family income level, and geographical region.  
19  
20  
21  
22  
23  
24  
25

26 To our knowledge, although previous studies have reported a higher prevalence of  
27 ASD and ADHD in children with cerebral palsy than in children without cerebral palsy<sup>6</sup>, no  
28 previous study has quantified the association (i.e., odds ratio or risk ratio) of cerebral palsy  
29 with ASD and ADHD in children. The significant association of cerebral palsy with ASD  
30 and ADHD is not surprising, because all these conditions result from impairment of certain  
31 functions in the brain. Cerebral palsy, ASD and ADHD may share early-life risk factors that  
32 may affect brain development during pregnancy and in infancy. Prematurity birth is the most  
33 prevalent risk factor for cerebral palsy<sup>21</sup>. In a previous study of 213 children diagnosed with  
34 cerebral palsy in Australia, 78% had a history of prematurity birth<sup>22</sup>. Prematurity birth has  
35 been associated with increased risk of ASD<sup>23,24</sup> and ADHD<sup>25</sup>. Maternal infection, another  
36 common risk factor for cerebral palsy<sup>26-29</sup>, has been associated with risk of ASD<sup>30</sup>. Maternal  
37 obesity was significantly associated with not only increased risk of cerebral palsy<sup>31</sup>, but also  
38 increased risk of ASD and ADHD<sup>32-34</sup>. Perinatal hypoxic-ischemic conditions, an important  
39  
40  
41  
42  
43  
44  
45  
46  
47  
48  
49  
50  
51  
52  
53  
54  
55

**Running Title: Association of Cerebral Palsy with ASD and ADHD**

---

1  
2  
3 cause of cerebral palsy<sup>35</sup>, was also related to increase risk of ASD<sup>36</sup> and ADHD<sup>37</sup>. In  
4  
5 addition, low Apgar score at birth was also associated with higher risk for cerebral palsy<sup>38</sup>  
6  
7 and ASD<sup>39</sup>.  
8  
9

10 This study has some strengths. First, it was based on a large, multi-racial/ethnic  
11  
12 population. The large sample size improves the statistical power and robustness of the  
13  
14 estimates, which is critical for assessing the association of rare exposure and outcomes such  
15  
16 as cerebral palsy and most neurodevelopmental disorders. Second, the NHIS uses in-person  
17  
18 household interviews for data collection. As a result, the questionnaire completeness in the  
19  
20 NHIS is extraordinarily high, with more than 99% of participants responded to the questions  
21  
22 regarding diagnosis of cerebral palsy and neurodevelopmental disorders. Third, the use of a  
23  
24 nationally representative sample of US population facilitates better generalizability of the  
25  
26 findings to a broader population. There are several limitations of this study. First, information  
27  
28 on physician's diagnosis of cerebral palsy and neurodevelopmental disorders was self-  
29  
30 reported, which may subject to misreporting and recall bias. Second, the gold standard  
31  
32 methods for diagnosing ASD or ADHD are not suitable for children with motor problems<sup>6</sup>.  
33  
34 Third, we could not assess the association of different subtypes of cerebral palsy<sup>40</sup> with  
35  
36 different subtypes of ASD and ADHD (i.e., primarily hyperactive-impulsive, primarily  
37  
38 inattentive, and combined type ADHD). Whether the observed association between cerebral  
39  
40 palsy and ASD differs across subtypes of cerebral palsy or ASD warrants further  
41  
42 investigation.  
43  
44  
45  
46  
47  
48

49 In conclusion, in a nationwide population-based study of US children, we found that  
50  
51 cerebral palsy was associated with five-fold increased risk of ASD and doubled risk of  
52  
53  
54

ADHD. Further investigation is warranted to replicate our findings and determine the underlying mechanisms.

**Contributors** **QC:** writing—original draft, quantitative analysis and guarantor. **MC:** writing—review and editing. **WB:** investigation, project administration, qualitative analysis. **AC:** writing—review and editing. **LS:** conceptualisation, writing—review and editing. **XZ:** quantitative analysis, writing—review and editing. **LM:** writing—review and editing. **GF:** conceptualisation, writing—review and editing, supervision. All authors have approved the final version of this manuscript.

**Funding:** this research received no specific grant from any funding agency in the public, commercial or not-for-profit sectors.

## References

1. Colver A, Fairhurst C, Pharoah PO. Cerebral palsy. *Lancet*. 2014;**383**:1240-9. doi: 10.1016/S0140-6736(13)61835-8.
2. Aisen ML, Kerkovich D, Mast J, *et al*. Cerebral palsy: clinical care and neurological rehabilitation. *Lancet Neurol*. 2011;**10**:844-52. doi: 10.1016/S1474-4422(11)70176-4.
3. Stavsky M, Mor O, Mastrolia SA, Greenbaum S, Than NG, Erez O. Cerebral Palsy-Trends in Epidemiology and Recent Development in Prenatal Mechanisms of Disease, Treatment, and Prevention. *Front Pediatr*. 2017;**5**:21. doi: 10.3389/fped.2017.00021.
4. MacLennan AH, Thompson SC, Gecz J. Cerebral palsy: causes, pathways, and the role of genetic variants. *Am J Obstet Gynecol*. 2015;**213**:779-88. doi: 10.1016/j.ajog.2015.05.034.
5. National Institute for Health and Care Excellence. Cerebral palsy in under 25s: assessment and management (NICE Guideline, No. 62). London: National Institute for Health and Care Excellence (UK); 2017.
6. Craig F, Savino R, Trabacca A. A systematic review of comorbidity between cerebral palsy, autism spectrum disorders and Attention Deficit Hyperactivity Disorder. *Eur J Paediatr Neurol*. 2019;**23**:31-42. doi: 10.1016/j.ejpn.2018.10.005.
7. Downs J, Blackmore AM, Epstein A, *et al*. The prevalence of mental health disorders and symptoms in children and adolescents with cerebral palsy: a systematic review and meta-analysis. *Dev Med Child Neurol*. 2018;**60**:30-8. doi: 10.1111/dmcn.13555.
8. American Psychiatric Association. Diagnostic and Statistical Manual of Mental Disorders (DSM-5). Washington, DC: American Psychiatric Association; 2013.
9. Lai MC, Lombardo MV, Baron-Cohen S. Autism. *Lancet*. 2014;**383**:896-910. doi: 10.1016/S0140-6736(13)61539-1.
10. Lord C, Charman T, Havdahl A, *et al*. The Lancet Commission on the future of care and clinical research in autism. *Lancet*. 2021. doi: 10.1016/S0140-6736(21)01541-5.
11. Thapar A, Cooper M. Attention deficit hyperactivity disorder. *Lancet*. 2016;**387**:1240-50. doi: 10.1016/S0140-6736(15)00238-X.
12. Craig F, Lamanna AL, Margari F, Matera E, Simone M, Margari L. Overlap Between Autism Spectrum Disorders and Attention Deficit Hyperactivity Disorder: Searching for Distinctive/Common Clinical Features. *Autism Res*. 2015;**8**:328-37. doi: 10.1002/aur.1449.
13. Simonoff E, Pickles A, Charman T, Chandler S, Loucas T, Baird G. Psychiatric disorders in children with autism spectrum disorders: prevalence, comorbidity, and associated factors in a population-derived sample. *J Am Acad Child Adolesc Psychiatry*. 2008;**47**:921-9. doi: 10.1097/CHI.0b013e318179964f.
14. Schiariti V, Mahdi S, Bolte S. International Classification of Functioning, Disability and Health Core Sets for cerebral palsy, autism spectrum disorder, and attention-deficit-hyperactivity disorder. *Dev Med Child Neurol*. 2018;**60**:933-41. doi: 10.1111/dmcn.13922.
15. Adams PF, Kirzinger WK, Martinez M. Summary health statistics for the U.S. population: National Health Interview Survey, 2012. *Vital Health Stat 10*. 2013:1-95.



## Running Title: Association of Cerebral Palsy with ASD and ADHD

16. Boyle CA, Boulet S, Schieve LA, *et al.* Trends in the prevalence of developmental disabilities in US children, 1997-2008. *Pediatrics*. 2011;**127**:1034-42. doi: 10.1542/peds.2010-2989.
17. Parsons VL, Moriarity C, Jonas K, Moore TF, Davis KE, Tompkins L. Design and estimation for the national health interview survey, 2006-2015. *Vital Health Stat 2*. 2014;1-53.
18. Zablotsky B, Black LI, Maenner MJ, *et al.* Prevalence and Trends of Developmental Disabilities among Children in the United States: 2009-2017. *Pediatrics*. 2019;**144**. doi: 10.1542/peds.2019-0811.
19. Xu G, Strathearn L, Liu B, Bao W. Prevalence of Autism Spectrum Disorder Among US Children and Adolescents, 2014-2016. *JAMA*. 2018;**319**:81-2. doi: 10.1001/jama.2017.17812.
20. Xu G, Strathearn L, Liu B, Yang B, Bao W. Twenty-Year Trends in Diagnosed Attention-Deficit/Hyperactivity Disorder Among US Children and Adolescents, 1997-2016. *JAMA Netw Open*. 2018;**1**:e181471. doi: 10.1001/jamanetworkopen.2018.1471.
21. Hirvonen M, Ojala R, Korhonen P, *et al.* Cerebral palsy among children born moderately and late preterm. *Pediatrics*. 2014;**134**:e1584-93. doi: 10.1542/peds.2014-0945.
22. Strijbis EM, Oudman I, van Essen P, MacLennan AH. Cerebral palsy and the application of the international criteria for acute intrapartum hypoxia. *Obstet Gynecol*. 2006;**107**:1357-65. doi: 10.1097/01.AOG.0000220544.21316.80.
23. Joseph RM, O'Shea TM, Allred EN, *et al.* Prevalence and associated features of autism spectrum disorder in extremely low gestational age newborns at age 10 years. *Autism Res*. 2017;**10**:224-32. doi: 10.1002/aur.1644.
24. Harel-Gadassi A, Friedlander E, Yaari M, *et al.* Risk for ASD in Preterm Infants: A Three-Year Follow-Up Study. *Autism Res Treat*. 2018;**2018**:8316212. doi: 10.1155/2018/8316212.
25. Lindstrom K, Lindblad F, Hjern A. Preterm birth and attention-deficit/hyperactivity disorder in schoolchildren. *Pediatrics*. 2011;**127**:858-65. doi: 10.1542/peds.2010-1279.
26. Grether JK, Nelson KB. Maternal infection and cerebral palsy in infants of normal birth weight. *JAMA*. 1997;**278**:207-11.
27. Neufeld MD, Frigon C, Graham AS, Mueller BA. Maternal infection and risk of cerebral palsy in term and preterm infants. *J Perinatol*. 2005;**25**:108-13. doi: 10.1038/sj.jp.7211219.
28. Ahlin K, Himmelmann K, Hagberg G, *et al.* Cerebral palsy and perinatal infection in children born at term. *Obstet Gynecol*. 2013;**122**:41-9. doi: 10.1097/AOG.0b013e318297f37f.
29. Ayubi E, Sarhadi S, Mansori K. Maternal Infection During Pregnancy and Risk of Cerebral Palsy in Children: A Systematic Review and Meta-analysis. *J Child Neurol*. 2021;**36**:385-402. doi: 10.1177/0883073820972507.
30. Jiang HY, Xu LL, Shao L, *et al.* Maternal infection during pregnancy and risk of autism spectrum disorders: A systematic review and meta-analysis. *Brain Behav Immun*. 2016;**58**:165-72. doi: 10.1016/j.bbi.2016.06.005.
31. Villamor E, Tedroff K, Peterson M, *et al.* Association Between Maternal Body Mass Index in Early Pregnancy and Incidence of Cerebral Palsy. *JAMA*. 2017;**317**:925-36. doi: 10.1001/jama.2017.0945.
32. Rivera HM, Christiansen KJ, Sullivan EL. The role of maternal obesity in the risk of neuropsychiatric disorders. *Front Neurosci*. 2015;**9**:194. doi: 10.3389/fnins.2015.00194.
33. Andersen CH, Thomsen PH, Nohr EA, Lemcke S. Maternal body mass index before pregnancy as a risk factor for ADHD and autism in children. *Eur Child Adolesc Psychiatry*. 2018;**27**:139-48. doi: 10.1007/s00787-017-1027-6.
34. Godfrey KM, Reynolds RM, Prescott SL, *et al.* Influence of maternal obesity on the long-term health of offspring. *Lancet Diabetes Endocrinol*. 2017;**5**:53-64. doi: 10.1016/S2213-8587(16)30107-3.

## Running Title: Association of Cerebral Palsy with ASD and ADHD

- 1  
2  
3 35. Hankins GD, Speer M. Defining the pathogenesis and pathophysiology of neonatal  
4 encephalopathy and cerebral palsy. *Obstet Gynecol.* 2003;**102**:628-36. doi: 10.1016/s0029-  
5 7844(03)00574-x.  
6  
7 36. Modabbernia A, Velthorst E, Reichenberg A. Environmental risk factors for autism: an evidence-  
8 based review of systematic reviews and meta-analyses. *Mol Autism.* 2017;**8**:13. doi:  
9 10.1186/s13229-017-0121-4.  
10 37. Zhu T, Gan J, Huang J, Li Y, Qu Y, Mu D. Association Between Perinatal Hypoxic-Ischemic  
11 Conditions and Attention-Deficit/Hyperactivity Disorder: A Meta-Analysis. *J Child Neurol.*  
12 2016;**31**:1235-44. doi: 10.1177/0883073816650039.  
13 38. Persson M, Razaz N, Tedroff K, Joseph KS, Cnattingius S. Five and 10 minute Apgar scores and  
14 risks of cerebral palsy and epilepsy: population based cohort study in Sweden. *BMJ.* 2018;**360**:k207.  
15 doi: 10.1136/bmj.k207.  
16 39. Modabbernia A, Sandin S, Gross R, *et al.* Apgar score and risk of autism. *Eur J Epidemiol.*  
17 2019;**34**:105-14. doi: 10.1007/s10654-018-0445-1.  
18 40. Rosenbaum P, Paneth N, Leviton A, *et al.* A report: the definition and classification of cerebral  
19 palsy April 2006. *Dev Med Child Neurol Suppl.* 2007;**109**:8-14.  
20  
21  
22  
23  
24  
25  
26  
27  
28  
29  
30  
31  
32  
33  
34  
35  
36  
37  
38  
39  
40  
41  
42  
43  
44  
45  
46  
47  
48  
49  
50  
51  
52  
53  
54  
55  
56  
57  
58  
59  
60

**Table 1. Characteristics of the study population (n= 177899), by cerebral palsy diagnosis.**

| <b>Variables</b>         | <b>Children without cerebral palsy</b> | <b>Children with cerebral palsy</b> |
|--------------------------|----------------------------------------|-------------------------------------|
| No. of participants      | 177297                                 | 602                                 |
| Age, year                | 9.99 (0.01)                            | 10.19 (0.23)                        |
| Sex                      |                                        |                                     |
| Male                     | 91280 (51.05%)                         | 350 (57.56%)                        |
| Female                   | 86017 (48.95%)                         | 252 (42.44%)                        |
| Race/ethnicity           |                                        |                                     |
| Hispanic                 | 48209 (20.61%)                         | 140 (16.72%)                        |
| Non-Hispanic White       | 87497 (57.32%)                         | 325 (60.60%)                        |
| Non-Hispanic Black       | 26412 (14.11%)                         | 102 (15.64%)                        |
| Other                    | 15179 (7.96%)                          | 35 (7.05%)                          |
| Family highest education |                                        |                                     |
| Less than high school    | 39159 (19.53%)                         | 132 (18.90%)                        |
| High school              | 20476 (11.51%)                         | 61 (9.88%)                          |
| College or higher        | 116741 (68.51%)                        | 405 (70.80%)                        |
| Missing                  | 921 (0.45%)                            | 4 (0.42%)                           |
| Family income to         |                                        |                                     |
| < 1.0                    | 28697 (16.49%)                         | 105 (19.43%)                        |
| 1.0-1.9                  | 34978 (19.72%)                         | 155 (24.28%)                        |
| 2.0-3.9                  | 47234 (26.84%)                         | 149 (26.20%)                        |
| >4.0                     | 42562 (24.34%)                         | 121 (19.61%)                        |
| Missing                  | 23826 (12.62%)                         | 72 (10.48%)                         |
| Geographic region        |                                        |                                     |
| Northeast                | 29462 (17.25%)                         | 109 (17.43%)                        |
| Midwest                  | 36451 (23.39%)                         | 128 (24.30%)                        |
| South                    | 64159 (36.31%)                         | 237 (38.26%)                        |
| West                     | 47225 (23.04%)                         | 128 (20.00%)                        |

**Running Title: Association of Cerebral Palsy with ASD and ADHD**

---

Data are presented as weighted means and standard errors in parentheses for continuous variables, and frequencies and weighted percentages in parentheses for categorical variables.

Confidential: For Review Only

**Table 2. Association of cerebral palsy with ASD and ADHD in US children (n=177899).**

|                      | OR (95% CI)      |                  | P-value |
|----------------------|------------------|------------------|---------|
|                      | Without CP       | With CP          |         |
| <b>ASD</b>           |                  |                  |         |
| No. of               | 1961/177297      | 36/602           |         |
| Model 1 <sup>a</sup> | 1.00 (reference) | 5.29 (3.39-8.26) | <0.001  |
| Model 2 <sup>b</sup> | 1.00 (reference) | 5.07 (3.25-7.91) | <0.001  |
| <b>ADHD</b>          |                  |                  |         |
| No. of               | 13592/177297     | 105/602          |         |
| Model 1 <sup>a</sup> | 1.00 (reference) | 2.10 (1.57-2.82) | <0.001  |
| Model 2 <sup>b</sup> | 1.00 (reference) | 1.95 (1.43-2.66) | <0.001  |

<sup>a</sup> Model 1: adjusted for age and sex.

<sup>b</sup> Model 2: model 1 plus race/ethnicity, family highest education level, family income to poverty ratio, and geographic region.

## Running Title: Association of Cerebral Palsy with ASD and ADHD

**Table 3. Stratified analysis for the association of cerebral palsy with ASD and ADHD in US children.**

|                | No. of CP cases/participants | ASD               |        | P for interaction | ADHD             |         | P for interaction |
|----------------|------------------------------|-------------------|--------|-------------------|------------------|---------|-------------------|
|                |                              | OR (95% CI)*      | P-     |                   | OR (95% CI)*     | P-value |                   |
| Age            |                              |                   |        |                   |                  |         |                   |
| 3-11 years     | 343/102227                   | 4.23 (2.41-7.43)  | <0.001 | 0.38              | 2.36 (1.57-3.55) | <0.001  | 0.43              |
| 12-17 years    | 259/75672                    | 5.74 (3.03-10.88) | <0.001 |                   | 1.74 (1.08-2.80) | 0.02    |                   |
| Sex            |                              |                   |        |                   |                  |         |                   |
| Boys           | 350/91630                    | 4.18 (2.44-7.16)  | <0.001 | 0.13              | 1.86 (1.28-2.72) | 0.001   | 0.61              |
| Girls          | 252/86269                    | 8.91 (4.04-19.66) | <0.001 |                   | 2.18 (1.32-3.60) | 0.002   |                   |
| Race/ethnicity |                              |                   |        |                   |                  |         |                   |
| White          | 325/87822                    | 4.99 (2.81-8.85)  | <0.001 | 0.95              | 1.51 (1.00-2.26) | 0.05    | 0.03              |
| Non-white      | 277/90077                    | 4.90 (2.52-9.53)  | <0.001 |                   | 2.92 (1.85-4.59) | <0.001  |                   |

**Abbreviations:** ASD, autism spectrum disorder; ADHD, attention deficit hyperactivity disorder; CI, confidence intervals; OR, odds ratio.

\*Multivariable model adjusted for age, sex, race/ethnicity, family highest education level, family income to poverty ratio, geographic region, except the stratifying factor.

# BMJ Paediatrics Open

## Association of Cerebral Palsy with Autism Spectrum Disorder and Attention Deficit Hyperactivity Disorder in Children: A Large-Scale Nationwide Population-Based Study

|                               |                                                                                                                                                                                                                                                                                                                                                                                                                                                                                                                                                                                                                                                                                                                                  |
|-------------------------------|----------------------------------------------------------------------------------------------------------------------------------------------------------------------------------------------------------------------------------------------------------------------------------------------------------------------------------------------------------------------------------------------------------------------------------------------------------------------------------------------------------------------------------------------------------------------------------------------------------------------------------------------------------------------------------------------------------------------------------|
| Journal:                      | <i>BMJ Paediatrics Open</i>                                                                                                                                                                                                                                                                                                                                                                                                                                                                                                                                                                                                                                                                                                      |
| Manuscript ID                 | bmjpo-2023-002343.R1                                                                                                                                                                                                                                                                                                                                                                                                                                                                                                                                                                                                                                                                                                             |
| Article Type:                 | Original research                                                                                                                                                                                                                                                                                                                                                                                                                                                                                                                                                                                                                                                                                                                |
| Date Submitted by the Author: | 11-Jan-2024                                                                                                                                                                                                                                                                                                                                                                                                                                                                                                                                                                                                                                                                                                                      |
| Complete List of Authors:     | Chen, Qiang; Zhuhai Women and Children's Hospital<br>Chen, Mingwu; University of Science and Technology of China, Department of Pediatrics<br>Bao, Wei; University of Science and Technology of China<br>Strathearn, Lane; University of Iowa Stead Family Children's Hospital; University of Iowa Carver College of Medicine, Stead Family Department of Pediatrics<br>Zang, Xiaodong; University of Science and Technology of China, Department of Pediatrics<br>Lun, Meng; University of Science and Technology of China, Department of Pediatrics<br>Xu, Guifeng; University of Science and Technology of China, Department of Pediatrics; The University of Iowa Roy J and Lucille A Carver College of Medicine, Pediatrics |
| Keywords:                     | Epidemiology                                                                                                                                                                                                                                                                                                                                                                                                                                                                                                                                                                                                                                                                                                                     |
|                               |                                                                                                                                                                                                                                                                                                                                                                                                                                                                                                                                                                                                                                                                                                                                  |

SCHOLARONE™  
Manuscripts



I, the Submitting Author has the right to grant and does grant on behalf of all authors of the Work (as defined in the below author licence), an exclusive licence and/or a non-exclusive licence for contributions from authors who are: i) UK Crown employees; ii) where BMJ has agreed a CC-BY licence shall apply, and/or iii) in accordance with the terms applicable for US Federal Government officers or employees acting as part of their official duties; on a worldwide, perpetual, irrevocable, royalty-free basis to BMJ Publishing Group Ltd ("BMJ") its licensees and where the relevant Journal is co-owned by BMJ to the co-owners of the Journal, to publish the Work in this journal and any other BMJ products and to exploit all rights, as set out in our [licence](#).

The Submitting Author accepts and understands that any supply made under these terms is made by BMJ to the Submitting Author unless you are acting as an employee on behalf of your employer or a postgraduate student of an affiliated institution which is paying any applicable article publishing charge ("APC") for Open Access articles. Where the Submitting Author wishes to make the Work available on an Open Access basis (and intends to pay the relevant APC), the terms of reuse of such Open Access shall be governed by a Creative Commons licence – details of these licences and which [Creative Commons](#) licence will apply to this Work are set out in our licence referred to above.

Other than as permitted in any relevant BMJ Author's Self Archiving Policies, I confirm this Work has not been accepted for publication elsewhere, is not being considered for publication elsewhere and does not duplicate material already published. I confirm all authors consent to publication of this Work and authorise the granting of this licence.



1  
2  
3 1 **Association of Cerebral Palsy with Autism Spectrum Disorder and Attention Deficit**  
4  
5 2 **Hyperactivity Disorder in Children: A Large-Scale Nationwide Population-Based Study**  
6  
7

8 3

9  
10 4 Qiang Chen<sup>1</sup>, Mingwu Chen<sup>2</sup>, Wei Bao<sup>3</sup>, Lane Strathearn<sup>4,5</sup>, Xiaodong Zang<sup>2</sup>, Lun Meng<sup>2</sup>,  
11  
12 5 Guifeng Xu<sup>2,3,6\*</sup>  
13

14 6

15  
16  
17 7 1 Zhuhai Center for Maternal and Child Health Care, Zhuhai Women and Children's  
18  
19 8 Hospital, Zhuhai, China

20  
21 9 2 Department of Pediatrics, The First Affiliated Hospital of USTC, Division of Life Sciences  
22  
23 10 and Medicine, University of Science and Technology of China, Hefei, Anhui, China

24  
25  
26 11 3 Institute of Public Health Sciences, Division of Life Sciences and Medicine, University of  
27  
28 12 Science and Technology of China, Hefei, Anhui, China

29  
30  
31 13 4 Center for Disabilities and Development, University of Iowa Stead Family Children's  
32  
33 14 Hospital, Iowa City, IA, USA

34  
35  
36 15 5 Division of Developmental Behavioral Pediatrics, Stead Family Department of Pediatrics,  
37  
38 16 University of Iowa Carver College of Medicine, Iowa City, IA, USA

39  
40 17 6 Anhui Provincial Center for Children's Development and Behavior, Hefei, Anhui, China

41  
42 18 **\*Corresponding author:** Guifeng Xu, MD, PhD, Department of Pediatrics, The First  
43  
44 19 Affiliated Hospital, University of Science and Technology of China, Hefei 230031, China;  
45  
46 20 Email: xguifeng365@ustc.edu.cn.

47 21 **Keywords:** cerebral palsy, autism spectrum disorder, attention-deficit/hyperactivity disorder

48  
49 22 **Word count:** Abstract #209, Text #2375  
50  
51  
52  
53  
54  
55  
56  
57  
58  
59  
60

**1 ABSTRACT**

2 **Objective** To examine the association of cerebral palsy with autism spectrum disorder (ASD  
3 and attention-deficit/hyperactivity disorder (ADHD), providing evidence for interdisciplinary  
4 medical service for children with cerebral palsy.

5 **Design** A large-scale nationwide population-based study.

6 **Setting** The National Health Interview Survey (NHIS).

7 **Patients** 177899 children aged 3-17 years old among NHIS participants from 1997 to 2003  
8 and 2008 to 2018.

9 **Results** Among the 177899 children included in this analysis, 602 (0.33%) had cerebral  
10 palsy, 1997 (1.16%) had ASD, and 13697 (7.91%) had ADHD. Compared to children  
11 without cerebral palsy, children with cerebral palsy had a higher prevalence of ASD (6.09%  
12 versus 1.15%;  $P < 0.001$ ) and ADHD (15.91% versus 7.89%;  $P < 0.001$ ). After adjustment  
13 for age, sex, race/ethnicity, family highest education level, family income level, and  
14 geographical region, the OR among children with cerebral palsy, compared with children  
15 without cerebral palsy, was 5.07 (95% CI 3.25-7.91) for ASD ( $P < 0.001$ ) and 1.95 (95% CI  
16 1.43-2.66) for ADHD ( $P < 0.001$ ). Furthermore, the association of cerebral palsy with ASD  
17 and ADHD remained significant in all subgroups stratified by age, sex and race.

18 **Conclusions** In a large, nationally representative sample of US children, this study shows  
19 that children with cerebral palsy are at an increased risk of ASD and ADHD.

**1 WHAT IS ALREADY KNOWN ON THIS TOPIC**

2 Cerebral palsy is caused by non-progressive disturbances that occurred in the developing  
3 fetal or infant brain. Neurodevelopmental disorders, such as intellectual disability and  
4 learning disability, are well documented comorbid conditions among children with cerebral  
5 palsy.

**7 WHAT THIS STUDY ADDS**

8 This study quantified the odds ratios of autism spectrum disorder (ASD) and attention  
9 deficit hyperactivity disorder (ADHD) among children with cerebral palsy, compared with  
10 children without cerebral palsy. Furthermore, the association of cerebral palsy with ASD and  
11 ADHD remained significant in all subgroups stratified by age, sex and race.

**13 HOW THIS STUDY MIGHT AFFECT RESEARCH, PRACTICE OR POLICY**

14 Cerebral palsy, ASD and ADHD are usually diagnosed in different clinical specialties,  
15 with different intervention approaches. Therefore, this study provides evidence of their co-  
16 occurrence risk, and informs better interdisciplinary clinic care.

17

## 1 INTRODUCTION

2 Cerebral palsy is a neurological disorder of motor impairment that results from non-  
3 progressive disturbances during brain development in fetuses or infants [1, 2]. It is a major  
4 cause of childhood disability. Worldwide prevalence estimates for cerebral palsy ranged from  
5 about 1.6 per 1000 live births in high-income countries to more than 4 per 1000 live births in  
6 low-and middle-income countries or children of a defined age range [3, 4]. Cerebral palsy  
7 varies in the timing of the lesion, the clinical presentation, and the site and severity of the  
8 impairments [5]. The multifactorial etiology of cerebral palsy may involve any insults with a  
9 negative impact on the developing fetal or neonatal brain, such as preterm birth, fetal growth  
10 restriction, multiple gestation, intrauterine infection, birth asphyxia, untreated maternal  
11 hypothyroidism, congenital malformations, and perinatal stroke [6, 7]. Most children with  
12 cerebral palsy have an abnormal brain magnetic resonance imaging (MRI) scan, including  
13 white matter damage, basal ganglia or deep grey matter damage, congenital malformation,  
14 and focal infarcts [8]. Motor disorders in cerebral palsy are often associated with  
15 disturbances of sensation, perception, cognition, communication, behavior, and epilepsy [9].  
16 Individuals with cerebral palsy have increased risk for emotional lability, irritability,  
17 impulsiveness, and behavioral problems [10]. Some neurodevelopmental disorders, such as  
18 intellectual disability and learning disability, are well documented comorbid conditions  
19 among children with cerebral palsy [11].

20 Autism spectrum disorder (ASD) and attention deficit/hyperactivity disorder (ADHD)  
21 are childhood-onset neurodevelopmental disorders with a worldwide prevalence of 1% and  
22 5%, respectively [12]. ASD is characterized by repetitive behaviors and restricted interests,  
23 social impairments, and communication difficulties [13], and ADHD is characterized by

1 persistent and impairing inattention, hyperactivity, and impulsivity [14]. Comorbidity and  
2 overlapping traits between ASD and ADHD are common [12, 15, 16]. Moreover, previous  
3 clinical and epidemiological studies reported that the prevalence of ASD and ADHD was  
4 higher in children with cerebral palsy, compared to children without cerebral palsy [9]. For  
5 example, the US Autism and Developmental Disabilities Monitoring Network 2008 reported  
6 that co-occurring ASD frequency was 6.9% among 8-year-old children with cerebral palsy  
7 [17], which was higher than the overall estimated ASD population prevalence of 1.1% in the  
8 same survey year [18]. The UK National Institute for Health and Care Excellence Clinical  
9 Guideline on cerebral palsy underlined the importance of investigating the prevalence of  
10 ASD and ADHD in children and young people with cerebral palsy [8]. ASD and ADHD are  
11 interrelated neurodevelopmental disorders and they may share pathological mechanisms and  
12 clinical features with cerebral palsy [19]. While previous studies have noted a higher co-  
13 occurrence of ASD and ADHD in children with cerebral palsy [9, 20, 21], very few studies  
14 have quantified the association (i.e., odds ratio or risk ratio) of cerebral palsy with ASD and  
15 ADHD [22, 23]. In this study, we analyzed large population-based data to quantify the  
16 association of cerebral palsy with ASD and ADHD, in a nationally representative sample of  
17 US children.

## 19 **METHODS**

### 20 **Study Population**

21 The National Health Interview Survey (NHIS), conducted annually by the Centers for  
22 Disease Control and Prevention, is a leading health survey in the United States [24]. It has  
23 become the principal source of information on health of the civilian non-institutionalized

**Running Title: Association of Cerebral Palsy with ASD and ADHD**

---

1 population of the United States. Annual sample size of the NHIS is about 35,000 households  
2 containing about 87,500 persons. The NHIS collects data on a broad range of health topics  
3 for all household members, including children, through in-person household interviews. The  
4 NHIS has a large sample size and a relatively high response rate. Annual sample size of the  
5 NHIS is about 35 000 households containing approximately 87 500 persons. In NHIS 1997-  
6 2018, the total household response rate ranged from 64.2% to 91.8% and conditional  
7 response rate for the sample child component ranged from 85.6% to 93.5%. In the current  
8 analysis, we included 177899 children aged 3-17 years old among participants in the NHIS  
9 from 1997 to 2003 and 2008 to 2018. We did not include data during survey years from 2004  
10 to 2007 because a previous report from the National Center on Birth Defects and  
11 Developmental Disabilities, Centers for Disease Control and Prevention indicated that there  
12 was high likelihood of interviewer error for cerebral palsy in 2004-2007 arising from a  
13 questionnaire change during those years [25]. All the NHIS datasets could be found in the  
14 U.S. CDC website: <https://www.cdc.gov/nchs/nhis/data-questionnaires-documentation.htm>.

**Ascertainment of Cerebral Palsy, ASD, and ADHD**

16 For each interviewed family in the household, one sample child (if any children aged  
17  $\leq 17$  years are present) is randomly selected through the field representative's computer  
18 program, and no differential sampling probabilities are applied to the children [26]. Detailed  
19 health-related information, including information on physical and mental health, is collected  
20 for the sample child. This information is provided by an adult (usually a parent) who is  
21 knowledgeable about the child's health.

22 Cerebral palsy was defined based on an affirmative response (i.e., yes) to the  
23 question : "Has a doctor or health professional ever told you that [the sample child] had

---

**Running Title: Association of Cerebral Palsy with ASD and ADHD**

---

1 cerebral palsy?” ASD was defined based on an affirmative response to a question asking  
2 whether the sample child received a diagnosis of ASD from a physician or other health  
3 professional. From 1997 to 2013, this question was asked as part of a 10-condition checklist.  
4 In 2014 onward, the question became a stand-alone item and the wording was revised to  
5 name specific conditions, including autism, Asperger disorder, pervasive developmental  
6 disorder, and ASD. ADHD was defined based on an affirmative response (i.e., yes) to the  
7 question: “Has a doctor or health professional ever told you that [the sample child] had  
8 attention-deficit/hyperactivity disorder (ADHD) or attention-deficit disorder (ADD)?”  
9 Among NHIS participants, more than 99% responded to the questions regarding diagnosis of  
10 cerebral palsy and neurodevelopmental disorders.

**11 Covariates Assessment**

12 Information on age, sex, race/ethnicity, family highest education level, family income,  
13 and geographic region was collected using standardized questionnaire during the interview.  
14 Race and Hispanic ethnicity were self-reported and classified based on the 1997 Office of  
15 Management and Budget Standards. Family highest education level was classified into less  
16 than high school, high school, and college or higher. Family income levels were classified  
17 according to the ratio of family income to federal poverty level (<1.0, 1.0-1.9, 2.0-3.9, and ≥  
18 4.0).

**19 Statistical Analysis**

20 We included survey sampling weights, strata, and primary sampling units in all the  
21 analyses to account for the unequal probabilities of selection, oversampling, and nonresponse  
22 in the complex survey design. Therefore, the results in this study are nationally representative  
23 of the US children. Comparisons of baseline characteristics among children with and without

**Running Title: Association of Cerebral Palsy with ASD and ADHD**

---

1 cerebral palsy were performed using linear regression for continuous variables and the chi-  
2 square test for categorical variables. We estimated the odds ratio (OR) and 95% confidence  
3 interval (CI) of ASD, ADHD, and other neurodevelopmental disabilities according to history  
4 of cerebral palsy diagnosis using multivariable logistic regression, adjusting for age, sex,  
5 race/ethnicity, family highest education level, family income to poverty ratio, and geographic  
6 region. All data analyses were conducted using survey procedures of SAS 9.4 (SAS Institute  
7 Inc., Cary, NC). Two-sided  $P < 0.05$  was considered statistically significant.

**8 Ethics Approval Statement**

9 The NHIS was approved by the Research Ethics Review Board of the NCHS and the  
10 U.S. Office of Management and Budget. All respondents provided oral consent prior to  
11 participation. The University of Science and Technology of China Institutional Review  
12 Board determined that the present study was exempt based on the use of de-identified data.

**14 RESULTS**

15 Among the 177899 children of 3-17 years included in this analysis, 602 (0.33%) had  
16 cerebral palsy, 1997 (1.16%) had ASD, and 13697 (7.91%) had ADHD. Children with  
17 cerebral palsy were more likely to be male and more likely to have lower family income than  
18 those without cerebral palsy (**Table 1**).

19 Compared with children without cerebral palsy, children with cerebral palsy had a  
20 higher prevalence of ASD (6.09% [95% CI 3.56-8.62] versus 1.15% [95% CI 1.07-1.22];  $P <$   
21 0.001) and ADHD (15.91% [95% CI 12.07-19.75] versus 7.89% [95% CI 7.72-8.06];  $P <$   
22 0.001). After adjustment for age, sex, race/ethnicity, family highest education level, family  
23 income level, and geographical region, compared with children without cerebral palsy, the



**Running Title: Association of Cerebral Palsy with ASD and ADHD**

---

1 OR among children with cerebral palsy was 5.07 (95% CI 3.25-7.91) for ASD ( $P < 0.001$ )  
2 and 1.95 (95% CI 1.43-2.66) for ADHD ( $P < 0.001$ ) (**Table 2**). These associations remained  
3 significant in stratified analyses by age, sex, and race/ethnicity. The association between  
4 cerebral palsy and ADHD appeared to be stronger among non-whites (2.92 [1.85-4.59]) than  
5 whites (1.51 [1.00-2.26]) ( $P$  for interaction = 0.03) (**Table 3**). There was suggesting evidence  
6 that the association between cerebral palsy and ASD may differ according to age and sex,  
7 which warrants further investigation in future studies with even larger number of  
8 participants.

9 In a sensitivity analysis among children ( $n=152043$ ) whose information was reported  
10 by their parents rather than other members in the household, the results were similar to our  
11 main results (**Supplementary Table**).

## 12 13 **DISCUSSION**

14 Using data from a large nationwide population-based study, we found a significant  
15 and positive association of cerebral palsy with ASD and ADHD. Compared with children  
16 without cerebral palsy, children with cerebral palsy were at five-fold risk for ASD and  
17 doubled risk for ADHD. The associations persisted after adjustment for age, sex,  
18 race/ethnicity, family highest education level, family income level, and geographical region.

19 To our knowledge, although previous studies have reported a higher prevalence of  
20 ASD and ADHD in children with cerebral palsy than in children without cerebral palsy [9,  
21 20, 21], very few studies have quantified the association (i.e., odds ratio or risk ratio) of  
22 cerebral palsy with ASD and ADHD in children, using a multivariable model adjusting for  
23 potential covariates. For example, Pålman et al. screened for ASD and ADHD in a cohort of

**Running Title: Association of Cerebral Palsy with ASD and ADHD**

---

1 200 children aged 7-18 years from the cerebral palsy register of western Sweden, and found  
2 that ASD and ADHD were common comorbidities in children with cerebral palsy [21].  
3 However, the sample size of this Swedish study [21] was limited and odds ratios of ASD and  
4 ADHD were not examined using a multivariable model. Similar to our findings,  
5 Rackauskaite et al. reported that after adjustment for the social variables, the odds ratios for  
6 ASD (OR=2.5; 95% CI 1.5-4.4) and ADHD (OR=2.0; 95% CI 1.2-3.2) were statistically  
7 significantly increased for children and adolescents with cerebral palsy compared to those  
8 without cerebral palsy in a cohort of 10-16 years children and adolescents in the Danish  
9 National Cerebral Palsy Registry [22]. Another study, using data from the Norwegian Patient  
10 Registry, reported significant risk difference of ASD and ADHD between individuals with  
11 and without cerebral palsy [23].

12       The significant association of cerebral palsy with ASD and ADHD is not surprising,  
13 because all these conditions result from impairment of certain functions in the brain. Cerebral  
14 palsy, ASD and ADHD may share early-life risk factors that may affect brain development  
15 during pregnancy and in infancy. Premature birth is the most prevalent risk factor for  
16 cerebral palsy [27]. In a previous study of 213 children diagnosed with cerebral palsy in  
17 Australia, 78% had a history of premature birth [28]. Premature birth has been also  
18 associated with increased risk of ASD [29] and ADHD [30]. Maternal infection, another  
19 common risk factor for cerebral palsy [31], has been associated with risk of ASD [32].  
20 Maternal obesity was significantly associated with not only increased risk of cerebral palsy  
21 [33], but also increased risk of ASD and ADHD [34]. Perinatal hypoxic-ischemic conditions  
22 (including middle cerebral artery infarction), an important cause of cerebral palsy [35], was

**Running Title: Association of Cerebral Palsy with ASD and ADHD**

---

1 also related to increase risk of ASD and ADHD[36, 37]. In addition, low Apgar score at birth  
2 was also associated with higher risk for cerebral palsy[38] and ASD [39].

3         This study has several strengths. First, it was based on a large, multi-racial/ethnic  
4 population. The large sample size improves the statistical power and robustness of the  
5 estimates, which is critical for assessing the association of rare exposure and outcomes such  
6 as cerebral palsy and most neurodevelopmental disorders. Second, the NHIS uses in-person  
7 household interviews for data collection. As a result, the questionnaire completeness in the  
8 NHIS is extraordinarily high, with more than 99% of participants responded to the questions  
9 regarding diagnosis of cerebral palsy and neurodevelopmental disorders. Third, the use of a  
10 nationally representative sample of US population facilitates better generalizability of the  
11 findings to a broader population. There are several limitations of this study. First, information  
12 on physician's diagnosis of cerebral palsy and neurodevelopmental disorders was self-  
13 reported, which may subject to misreporting and recall bias. Second, routine methods for  
14 diagnosing ASD or ADHD may not be suitable for children with motor problems [9]. There  
15 could be under-identification of ASD and ADHD due to overshadowing of the motor  
16 disorder. This could vary with different gross motor function levels as more severe motor  
17 problems, indicated by a higher Gross Motor Function Classification System (GMFCS) level,  
18 may present more challenges for ASD and ADHD diagnostic processes. Third, compared to  
19 the general population, children with cerebral palsy could also be over-identified with ASD  
20 and ADHD because of the need of more frequent contacts with health care services. Fourth,  
21 over the past two decades, there have been changes in the diagnostic criteria for ASD and  
22 cerebral palsy, which could also affect the associations. Fifth, we could not assess the  
23 association of different sub-types and different GMFCS levels of cerebral palsy [40] with

Running Title: Association of Cerebral Palsy with ASD and ADHD

---

1 different subtypes of ASD and ADHD (i.e., primarily hyperactive-impulsive, primarily  
2 inattentive, and combined type ADHD). Whether the observed association between cerebral  
3 palsy and ASD/ADHD differs across subtypes and severity levels of cerebral palsy or  
4 ASD/ADHD warrants further investigation.

5 In conclusion, in a nationwide population-based study of US children, we found that  
6 cerebral palsy was associated with five-fold increased risk of ASD and doubled risk of  
7 ADHD. These findings indicate cerebral palsy as an early life sign for children who are at  
8 risk of developing ASD or ADHD, because cerebral palsy is generally diagnosed during the  
9 first or second year after birth. Further investigation is warranted to replicate our findings and  
10 determine the underlying mechanisms.

11  
12 **Contributors:** **QC:** writing—original draft, quantitative analysis and guarantor. **MC:**  
13 writing—review and editing. **WB:** investigation, project administration, writing—review and  
14 editing. **AC:** writing—review and editing. **LS:** conceptualisation, writing—review and  
15 editing. **XZ:** quantitative analysis, writing—review and editing. **LM:** writing—review and  
16 editing. **GF:** conceptualisation, writing—review and editing, supervision. All authors have  
17 approved the final version of this manuscript.

18 **Funding:** this research received no specific grant from any funding agency in the public,  
19 commercial or not-for-profit sectors.

20 **Competing interest :** No competing interest.

## References

1. Friedman, J.M., P. van Essen, and C.D.M. van Karnebeek, *Cerebral palsy and related neuromotor disorders: Overview of genetic and genomic studies*. Mol Genet Metab, 2022. **137**(4): p. 399-419.
2. Michael-Asalu, A., et al., *Cerebral Palsy: Diagnosis, Epidemiology, Genetics, and Clinical Update*. Adv Pediatr, 2019. **66**: p. 189-208.
3. McIntyre, S., et al., *Global prevalence of cerebral palsy: A systematic analysis*. Dev Med Child Neurol, 2022. **64**(12): p. 1494-1506.
4. McIntyre, S., et al., *Global prevalence of cerebral palsy: A systematic analysis*. Dev Med Child Neurol, 2022. **64**(12): p. 1494-1506.
5. Colver, A., C. Fairhurst, and P.O. Pharoah, *Cerebral palsy*. Lancet, 2014. **383**(9924): p. 1240-9.
6. Stavsky, M., et al., *Cerebral Palsy-Trends in Epidemiology and Recent Development in Prenatal Mechanisms of Disease, Treatment, and Prevention*. Front Pediatr, 2017. **5**: p. 21.
7. MacLennan, A.H., S.C. Thompson, and J. Gecz, *Cerebral palsy: causes, pathways, and the role of genetic variants*. Am J Obstet Gynecol, 2015. **213**(6): p. 779-88.
8. National Institute for Health and Care Excellence, *Cerebral palsy in under 25s: assessment and management (NICE Guideline, No. 62)*. 2017, London: National Institute for Health and Care Excellence (UK).
9. Craig, F., R. Savino, and A. Trabacca, *A systematic review of comorbidity between cerebral palsy, autism spectrum disorders and Attention Deficit Hyperactivity Disorder*. Eur J Paediatr Neurol, 2019. **23**(1): p. 31-42.
10. Downs, J., et al., *The prevalence of mental health disorders and symptoms in children and adolescents with cerebral palsy: a systematic review and meta-analysis*. Dev Med Child Neurol, 2018. **60**(1): p. 30-38.
11. Reid, S.M., et al., *Intellectual disability in cerebral palsy: a population-based retrospective study*. Dev Med Child Neurol, 2018. **60**(7): p. 687-694.
12. American Psychiatric Association, *Diagnostic and Statistical Manual of Mental Disorders (DSM-5)*. 2013, Washington, DC: American Psychiatric Association.
13. Lai, M.C., M.V. Lombardo, and S. Baron-Cohen, *Autism*. Lancet, 2014. **383**(9920): p. 896-910.
14. Thapar, A. and M. Cooper, *Attention deficit hyperactivity disorder*. Lancet, 2016. **387**(10024): p. 1240-50.
15. Craig, F., et al., *Overlap Between Autism Spectrum Disorders and Attention Deficit Hyperactivity Disorder: Searching for Distinctive/Common Clinical Features*. Autism Res, 2015. **8**(3): p. 328-37.
16. Simonoff, E., et al., *Psychiatric disorders in children with autism spectrum disorders: prevalence, comorbidity, and associated factors in a population-derived sample*. J Am Acad Child Adolesc Psychiatry, 2008. **47**(8): p. 921-9.
17. Christensen, D., et al., *Prevalence of cerebral palsy, co-occurring autism spectrum disorders, and motor functioning - Autism and Developmental Disabilities Monitoring Network, USA, 2008*. Dev Med Child Neurol, 2014. **56**(1): p. 59-65.
18. Autism and Developmental Disabilities Monitoring Network Surveillance Year 2008 Principal Investigators, *Prevalence of autism spectrum disorders--Autism and Developmental Disabilities Monitoring Network, 14 sites, United States, 2008*. MMWR Surveill Summ, 2012. **61**(3): p. 1-19.

## Running Title: Association of Cerebral Palsy with ASD and ADHD

19. Schiariti, V., S. Mahdi, and S. Bolte, *International Classification of Functioning, Disability and Health Core Sets for cerebral palsy, autism spectrum disorder, and attention-deficit-hyperactivity disorder*. *Dev Med Child Neurol*, 2018. **60**(9): p. 933-941.
20. Pahlman, M., C. Gillberg, and K. Himmelmann, *Autism and attention-deficit/hyperactivity disorder in children with cerebral palsy: high prevalence rates in a population-based study*. *Dev Med Child Neurol*, 2021. **63**(3): p. 320-327.
21. Pahlman, M., et al., *Autism spectrum disorder and attention-deficit/hyperactivity disorder in children with cerebral palsy: results from screening in a population-based group*. *Eur Child Adolesc Psychiatry*, 2020. **29**(11): p. 1569-1579.
22. Rackauskaite, G., et al., *Prevalence of mental disorders in children and adolescents with cerebral palsy: Danish nationwide follow-up study*. *Eur J Paediatr Neurol*, 2020. **27**: p. 98-103.
23. Hollung, S.J., et al., *Comorbidities in cerebral palsy: a patient registry study*. *Dev Med Child Neurol*, 2020. **62**(1): p. 97-103.
24. Adams, P.F., W.K. Kirzinger, and M. Martinez, *Summary health statistics for the U.S. population: National Health Interview Survey, 2012*. *Vital Health Stat 10*, 2013(259): p. 1-95.
25. Boyle, C.A., et al., *Trends in the prevalence of developmental disabilities in US children, 1997-2008*. *Pediatrics*, 2011. **127**(6): p. 1034-42.
26. Parsons, V.L., et al., *Design and estimation for the national health interview survey, 2006-2015*. *Vital Health Stat 2*, 2014(165): p. 1-53.
27. Hirvonen, M., et al., *Cerebral palsy among children born moderately and late preterm*. *Pediatrics*, 2014. **134**(6): p. e1584-93.
28. Strijbis, E.M., et al., *Cerebral palsy and the application of the international criteria for acute intrapartum hypoxia*. *Obstet Gynecol*, 2006. **107**(6): p. 1357-65.
29. Harel-Gadassi, A., et al., *Risk for ASD in Preterm Infants: A Three-Year Follow-Up Study*. *Autism Res Treat*, 2018. **2018**: p. 8316212.
30. Lindstrom, K., F. Lindblad, and A. Hjern, *Preterm birth and attention-deficit/hyperactivity disorder in schoolchildren*. *Pediatrics*, 2011. **127**(5): p. 858-65.
31. Ayubi, E., S. Sarhadi, and K. Mansori, *Maternal Infection During Pregnancy and Risk of Cerebral Palsy in Children: A Systematic Review and Meta-analysis*. *J Child Neurol*, 2021. **36**(5): p. 385-402.
32. Jiang, H.Y., et al., *Maternal infection during pregnancy and risk of autism spectrum disorders: A systematic review and meta-analysis*. *Brain Behav Immun*, 2016. **58**: p. 165-172.
33. Villamor, E., et al., *Association Between Maternal Body Mass Index in Early Pregnancy and Incidence of Cerebral Palsy*. *JAMA*, 2017. **317**(9): p. 925-936.
34. Andersen, C.H., et al., *Maternal body mass index before pregnancy as a risk factor for ADHD and autism in children*. *Eur Child Adolesc Psychiatry*, 2018. **27**(2): p. 139-148.
35. Hankins, G.D. and M. Speer, *Defining the pathogenesis and pathophysiology of neonatal encephalopathy and cerebral palsy*. *Obstet Gynecol*, 2003. **102**(3): p. 628-36.
36. M, P.A., C. Gillberg, and K. Himmelmann, *Neuroimaging findings in children with cerebral palsy with autism and/or attention-deficit/hyperactivity disorder: a population-based study*. *Dev Med Child Neurol*, 2022. **64**(1): p. 63-69.
37. Zhu, T., et al., *Association Between Perinatal Hypoxic-Ischemic Conditions and Attention-Deficit/Hyperactivity Disorder: A Meta-Analysis*. *J Child Neurol*, 2016. **31**(10): p. 1235-44.
38. Persson, M., et al., *Five and 10 minute Apgar scores and risks of cerebral palsy and epilepsy: population based cohort study in Sweden*. *BMJ*, 2018. **360**: p. k207.



## Running Title: Association of Cerebral Palsy with ASD and ADHD

- 1  
2  
3 1 39. Modabbernia, A., et al., *Apgar score and risk of autism*. Eur J Epidemiol, 2019. **34**(2): p. 105-  
4 2 114.  
5 3 40. Rosenbaum, P., et al., *A report: the definition and classification of cerebral palsy April 2006*.  
6 4 Dev Med Child Neurol Suppl, 2007. **109**: p. 8-14.  
7  
8  
9 5  
10 6  
11  
12  
13  
14  
15  
16  
17  
18  
19  
20  
21  
22  
23  
24  
25  
26  
27  
28  
29  
30  
31  
32  
33  
34  
35  
36  
37  
38  
39  
40  
41  
42  
43  
44  
45  
46  
47  
48  
49  
50  
51  
52  
53  
54  
55  
56  
57  
58  
59  
60

Confidential: For Review Only

## Running Title: Association of Cerebral Palsy with ASD and ADHD

**Table 1. Characteristics of the study population among U.S. Children aged 3-17 years, by cerebral palsy diagnosis.**

| <b>Variables</b>                                           | <b>Children without cerebral palsy (N, weighted %)</b> | <b>Children with cerebral palsy (N, weighted %)</b> |
|------------------------------------------------------------|--------------------------------------------------------|-----------------------------------------------------|
| No. of participants                                        | 177297                                                 | 602                                                 |
| Age, year                                                  | 9.99 (0.01)                                            | 10.19 (0.23)                                        |
| Sex, N (%)                                                 |                                                        |                                                     |
| Male                                                       | 91280 (51.1)                                           | 350 (57.6)                                          |
| Female                                                     | 86017 (48.9)                                           | 252 (42.4)                                          |
| Race/ethnicity, N (%)                                      |                                                        |                                                     |
| Hispanic                                                   | 48209 (20.6)                                           | 140 (16.7)                                          |
| Non-Hispanic White                                         | 87497 (57.3)                                           | 325 (60.6)                                          |
| Non-Hispanic Black                                         | 26412 (14.1)                                           | 102 (15.6)                                          |
| Other                                                      | 15179 (8.0)                                            | 35 (7.1)                                            |
| Family highest education level, N (%)                      |                                                        |                                                     |
| Less than high school                                      | 39159 (19.5)                                           | 132 (18.9)                                          |
| High school                                                | 20476 (11.5)                                           | 61 (9.9)                                            |
| College or higher                                          | 116741 (68.5)                                          | 405 (70.8)                                          |
| Missing                                                    | 921 (0.5)                                              | 4 (0.4)                                             |
| Ratio of family income to the federal poverty level, N (%) |                                                        |                                                     |
| < 1.0                                                      | 28697 (16.5)                                           | 105 (19.4)                                          |
| 1.0-1.9                                                    | 34978 (19.7)                                           | 155 (24.3)                                          |
| 2.0-3.9                                                    | 47234 (26.8)                                           | 149 (26.2)                                          |
| >4.0                                                       | 42562 (24.3)                                           | 121 (19.6)                                          |
| Missing                                                    | 23826 (12.6)                                           | 72 (10.5)                                           |
| Geographic region, N (%)                                   |                                                        |                                                     |
| Northeast                                                  | 29462 (17.3)                                           | 109 (17.4)                                          |
| Midwest                                                    | 36451 (23.4)                                           | 128 (24.3)                                          |
| South                                                      | 64159 (36.3)                                           | 237 (38.3)                                          |
| West                                                       | 47225 (23.0)                                           | 128 (20.0)                                          |



## Running Title: Association of Cerebral Palsy with ASD and ADHD

---

|             |                |            |
|-------------|----------------|------------|
| ASD, N (%)  |                |            |
| No          | 175336 (98.9 ) | 566 (93.9) |
| Yes         | 1961 (1.1)     | 36 (6.1)   |
| ADHD, N (%) |                |            |
| No          | 163705 (92.1)  | 497 (84.1) |
| Yes         | 13592 (7.9)    | 105 (15.9) |

---

- 1 Data are presented as weighted means and standard errors in parentheses for continuous  
2 variables, and frequencies and weighted percentages in parentheses for categorical variables.

1 **Table 2. Association of cerebral palsy with ASD and ADHD in US children.**

|                                 | OR (95% CI)            |                     | P-value |
|---------------------------------|------------------------|---------------------|---------|
|                                 | Without cerebral palsy | With cerebral palsy |         |
| <b>ASD</b>                      |                        |                     |         |
| No. of cases/total participants | 1961/177297            | 36/602              |         |
| Model 1 <sup>a</sup>            | 1.00 (reference)       | 5.29 (3.39-8.26)    | <0.001  |
| Model 2 <sup>b</sup>            | 1.00 (reference)       | 5.07 (3.25-7.91)    | <0.001  |
| <b>ADHD</b>                     |                        |                     |         |
| No. of cases/total participants | 13592/177297           | 105/602             |         |
| Model 1 <sup>a</sup>            | 1.00 (reference)       | 2.10 (1.57-2.82)    | <0.001  |
| Model 2 <sup>b</sup>            | 1.00 (reference)       | 1.95 (1.43-2.66)    | <0.001  |

2 <sup>a</sup> Model 1: adjusted for age and sex.3 <sup>b</sup> Model 2: model 1 plus race/ethnicity, family highest education level, family income to  
4 poverty ratio, and geographic region.

5

## Running Title: Association of Cerebral Palsy with ASD and ADHD

**Table 3. Stratified analysis for the association of cerebral palsy with ASD and ADHD in US children.**

|                | No. of cerebral palsy cases/participants | ASD               |         | P for interaction | ADHD             |         | P for interaction |
|----------------|------------------------------------------|-------------------|---------|-------------------|------------------|---------|-------------------|
|                |                                          | OR (95% CI)*      | P-value |                   | OR (95% CI)*     | P-value |                   |
| Age            |                                          |                   |         |                   |                  |         |                   |
| 3-11 years     | 343/102227                               | 4.23 (2.41-7.43)  | <0.001  | 0.38              | 2.36 (1.57-3.55) | <0.001  | 0.43              |
| 12-17 years    | 259/75672                                | 5.74 (3.03-10.88) | <0.001  |                   | 1.74 (1.08-2.80) | 0.02    |                   |
| Sex            |                                          |                   |         |                   |                  |         |                   |
| Boys           | 350/91630                                | 4.18 (2.44-7.16)  | <0.001  | 0.13              | 1.86 (1.28-2.72) | 0.001   | 0.61              |
| Girls          | 252/86269                                | 8.91 (4.04-19.66) | <0.001  |                   | 2.18 (1.32-3.60) | 0.002   |                   |
| Race/ethnicity |                                          |                   |         |                   |                  |         |                   |
| White          | 325/87822                                | 4.99 (2.81-8.85)  | <0.001  | 0.95              | 1.51 (1.00-2.26) | 0.05    | 0.03              |
| Non-white      | 277/90077                                | 4.90 (2.52-9.53)  | <0.001  |                   | 2.92 (1.85-4.59) | <0.001  |                   |

**Abbreviations:** ASD, autism spectrum disorder; ADHD, attention deficit hyperactivity disorder; CI, confidence intervals; OR, odds ratio.

\*Multivariable model adjusted for age, sex, race/ethnicity, family highest education level, family income to poverty ratio, geographic region, except the stratifying factor.

1  
2  
3  
4  
5  
6  
7  
8  
9  
10  
11  
12  
13  
14  
15  
16  
17  
18  
19  
20  
21  
22  
23  
24  
25  
26  
27  
28  
29  
30  
31  
32  
33  
34  
35  
36  
37  
38  
39  
40  
41  
42  
43  
44  
45  
46  
47

Confidential: For Review Only

**Supplementary Table. Sensitivity analysis for the association of cerebral palsy with ASD and ADHD in US children, whose information was reported by their parents (n=152043).**

|                      | OR (95% CI)      |                     | P-value |
|----------------------|------------------|---------------------|---------|
|                      | Without cerebral | With cerebral palsy |         |
| <b>ASD</b>           |                  |                     |         |
| No. of cases/total   | 1797/151548      | 28/495              |         |
| Model 1 <sup>a</sup> | 1.00 (reference) | 5.02 (3.05-8.27)    | <0.001  |
| Model 2 <sup>b</sup> | 1.00 (reference) | 4.77 (2.89-7.86)    | <0.001  |
| <b>ADHD</b>          |                  |                     |         |
| No. of cases/total   | 11570/151548     | 87/495              |         |
| Model 1 <sup>a</sup> | 1.00 (reference) | 2.01 (1.43-2.81)    | <0.001  |
| Model 2 <sup>b</sup> | 1.00 (reference) | 1.84 (1.28-2.65)    | <0.001  |

<sup>a</sup> Model 1: adjusted for age and sex.

<sup>b</sup> Model 2: model 1 plus race/ethnicity, family highest education level, family income to poverty ratio, and geographic region.
