# Supplementary material for: Association of cerebral palsy with autism spectrum disorder and attention-deficit/hyperactivity disorder in children: a large-scale nationwide population-based study
Source: PubMed Central journal article supplement — BMJ Paediatr Open. 2024 Apr 9;8(1):e002343. doi: 10.1136/bmjpo-2023-002343 (PMC11015243; doi:10.1136/bmjpo-2023-002343), 2024-04-09
Supplement: bmjpo-2023-002343supp001.pdf [file bmjpo-2023-002343supp001.pdf]

**Supplementary Table. Sensitivity analysis for the association of cerebral palsy with ASD and ADHD in US children, whose information was reported by their parents (n=152043).**

|                      | OR (95% CI)      |                     | P-value |
|----------------------|------------------|---------------------|---------|
|                      | Without cerebral | With cerebral palsy |         |
| <b>ASD</b>           |                  |                     |         |
| No. of cases/total   | 1797/151548      | 28/495              |         |
| Model 1 <sup>a</sup> | 1.00 (reference) | 5.02 (3.05-8.27)    | <0.001  |
| Model 2 <sup>b</sup> | 1.00 (reference) | 4.77 (2.89-7.86)    | <0.001  |
| <b>ADHD</b>          |                  |                     |         |
| No. of cases/total   | 11570/151548     | 87/495              |         |
| Model 1 <sup>a</sup> | 1.00 (reference) | 2.01 (1.43-2.81)    | <0.001  |
| Model 2 <sup>b</sup> | 1.00 (reference) | 1.84 (1.28-2.65)    | <0.001  |

<sup>a</sup> Model 1: adjusted for age and sex.

<sup>b</sup> Model 2: model 1 plus race/ethnicity, family highest education level, family income to poverty ratio, and geographic region.
